# Supplementary material for: Directed evolution of an m6A eraser for site-selective epitranscriptome editing
Source: Research Square preprint supplement (doi:10.21203/rs.3.rs-7958216/v1), 2025-11-04
Supplement: Supplementary file 1 [file 970174131f140552df7251e7.docx]

Supplementary Figures and Tables

**Directed evolution of an m6A eraser for site-selective epitranscriptome editing**

Chuan-Hui Wang1, Huiqing Zhou1,*

1. Department of Chemistry, Merkert Chemistry Center, Boston College, Chestnut Hill, MA 02467, USA

*To whom correspondence should be addressed.

Email: huiqing.zhou@bc.edu


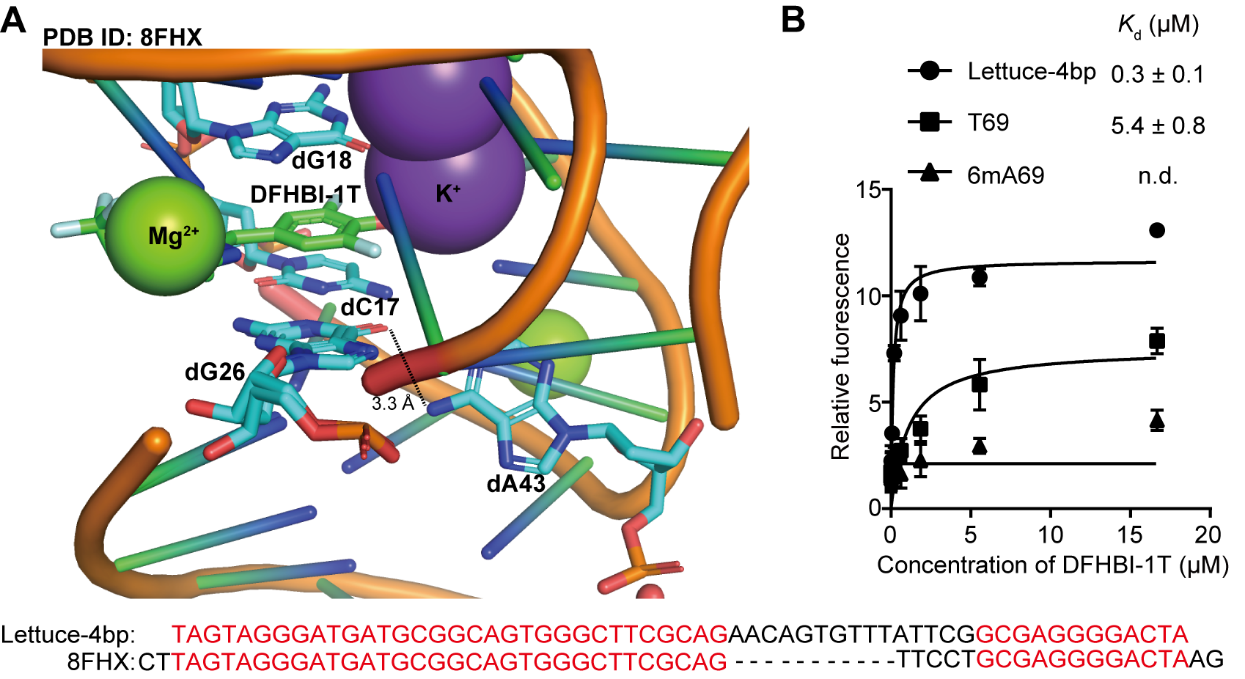


**Supplementary Figure 1. Structural and functional analysis of Lettuce-4bp DNA aptamer.**

(A) Zoomed-in view of the fluorophore (DFHBI-1T) binding site in the crystal structure of Lettuce DNA aptamer, alongside a sequence alignment between Lettuce-4bp (this study) with the crystallized sequence.

(B) Dissociation constants (*K*d) for DFHBI-1T binding to the Lettuce-4bp aptamer and its T69 and 6mA69 mutants, determined using a fluorescence activation assay. Data are presented as mean ± SD with n=2 biological replicates.


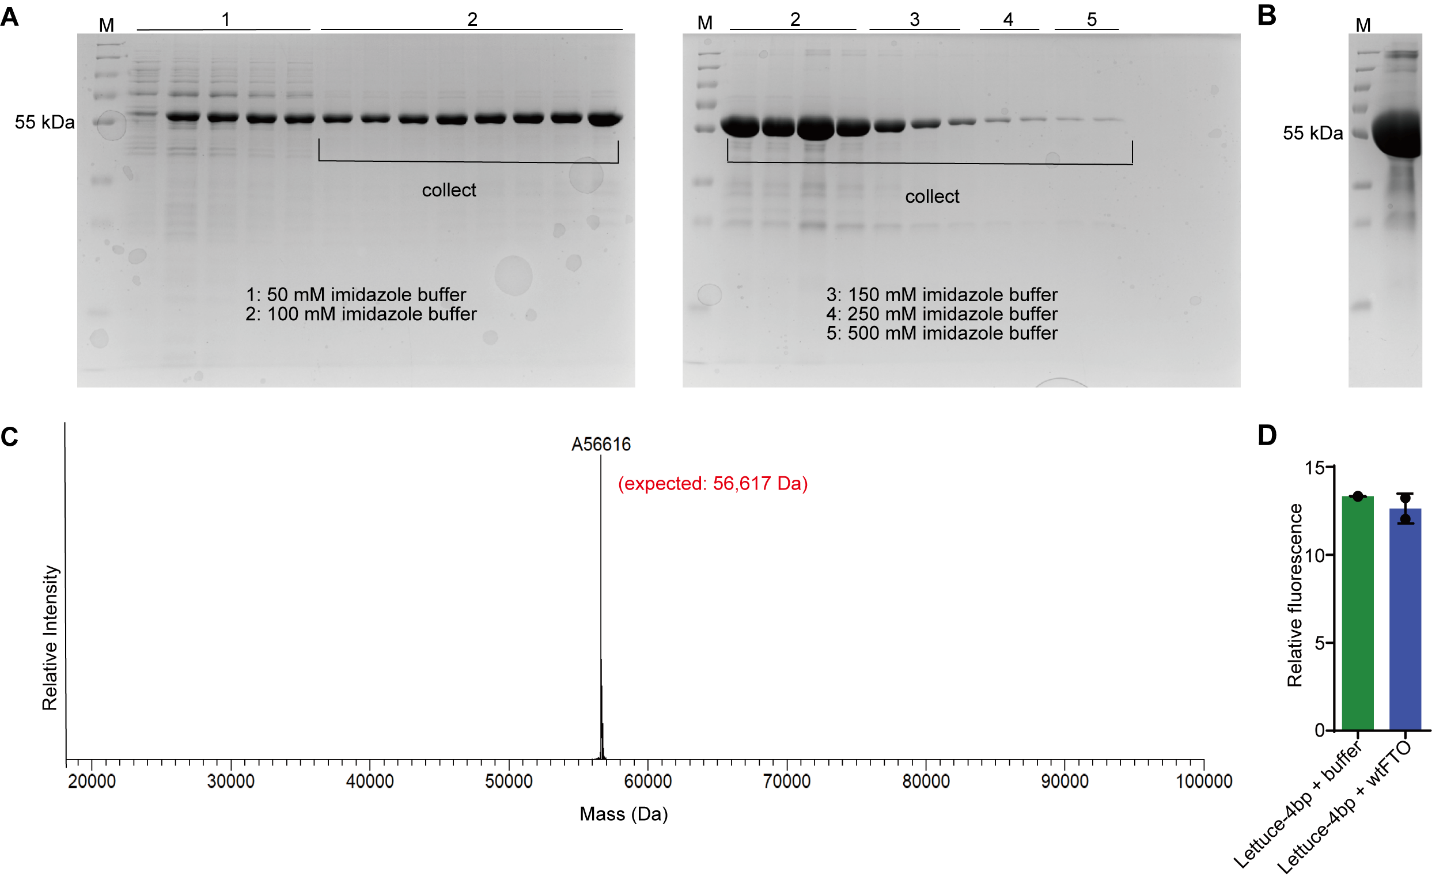


**Supplementary Figure 2. Purify and characterize the wtFTO protein.**

(A) SDS-PAGE characterizations of the purified wtFTO protein. wtFTO protein was purified by a Nickel column with an imidazole concentration gradient in lysis buffer.

(B) SDS-PAGE characterization of the purity of wtFTO protein after buffer exchange.

(C) Full deconvolution of MS data of wtFTO protein (black, observed mass; red, theoretical mass).

(D) Purified wtFTO protein showed no detectable DNase activity. 4 μM wtFTO was incubated with 2.5 μM Lettuce-4bp at 37 °C for 2 hours. Data are presented as mean ± SD with n=2 biological replicates.


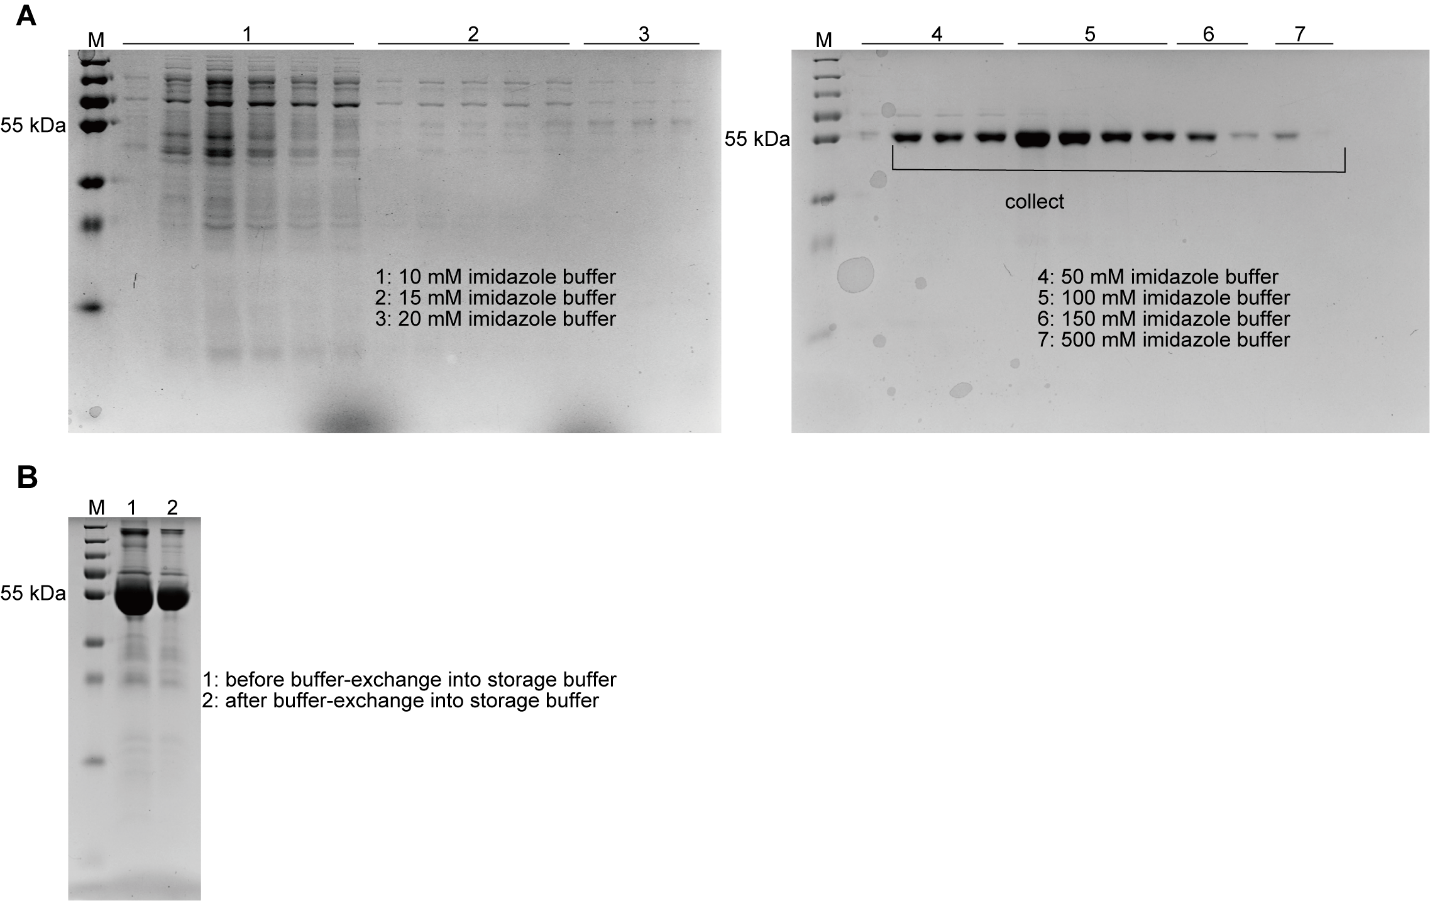


**Supplementary Figure 3. Purify and characterize the R316Q FTO mutant protein.**

(A) SDS-PAGE characterizations of the purified R316Q FTO mutant protein. R316Q protein was purified by a Nickel column with an imidazole concentration gradient in lysis buffer.

(B) SDS-PAGE characterization of the purity of R316Q FTO mutant protein before and after buffer exchange.


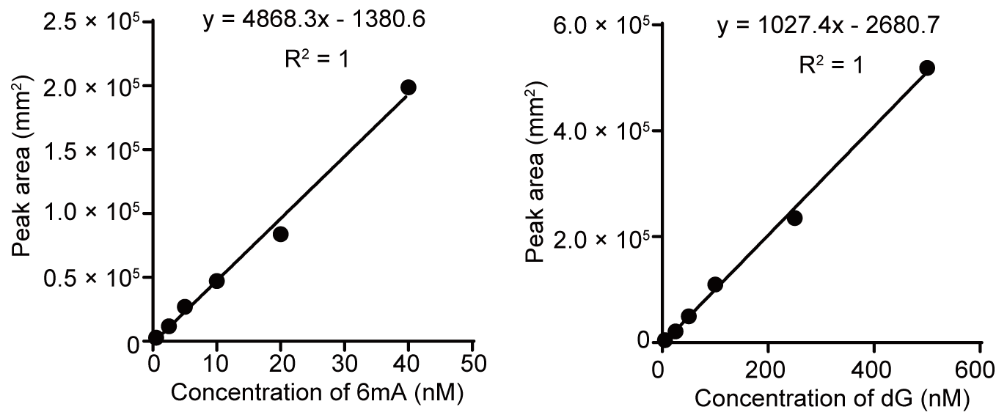


**Supplementary Figure 4. Calibration curves and corresponding equations for the quantification of 6mA and dG used in Figure 1E.**


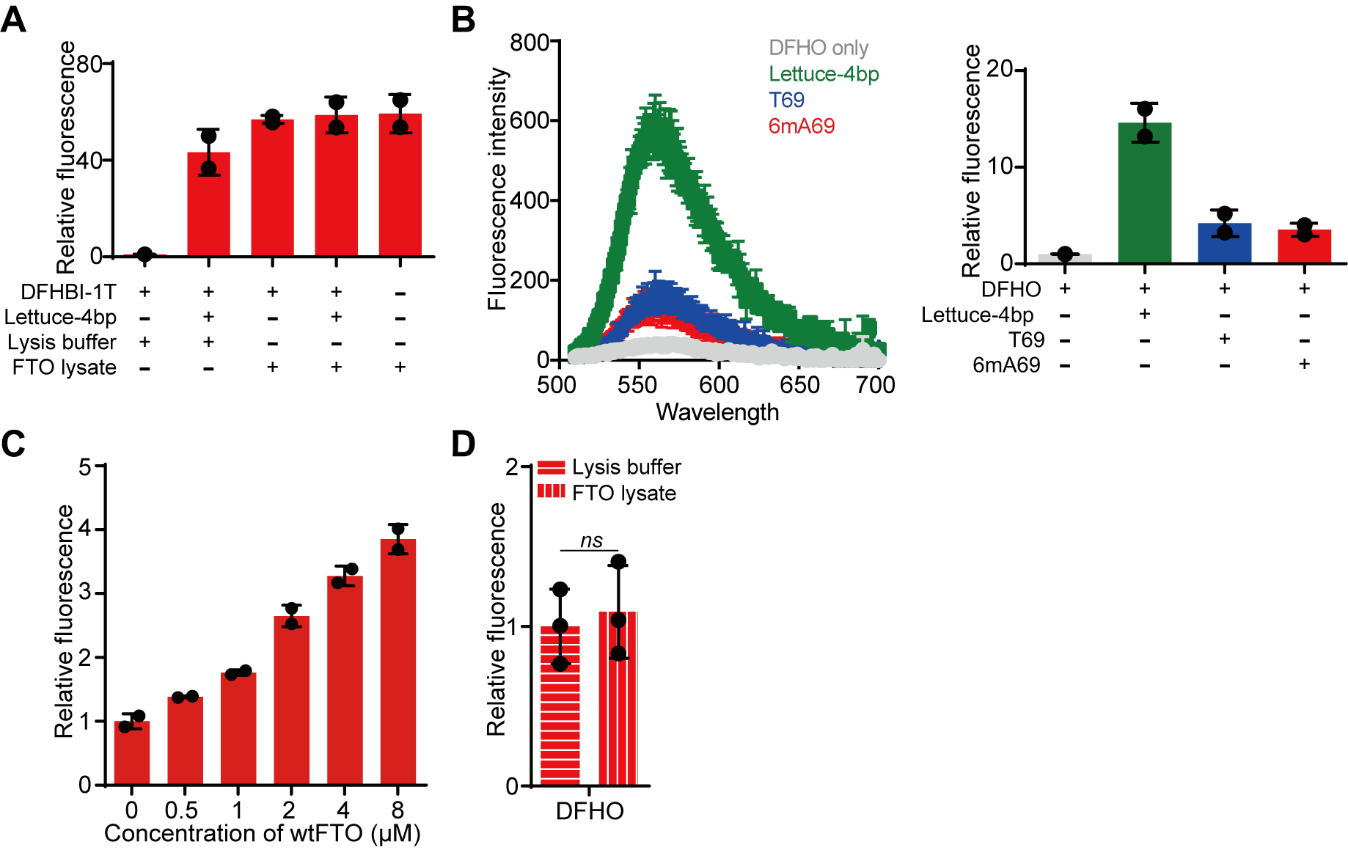


**Supplementary Figure 5. Fluorescence measurements using DFHO as the reporter fluorophore activated by Lettuce-4bp.**

(A) Cell lysate from wtFTO exhibited high background fluorescence at 505 nm (excitation 455 nm) in the absence of Lettuce-4bp aptamer and DFHBI-1T. 2.5 μM of Lettuce-4bp and 1.25 μM of DFHBI-1T were used. Data are presented as mean ± SD with n=2 biological replicates.

(B) Fluorescence spectra of Lettuce-4bp, T69, and 6mA69 measured in the presence of DFHO (left; excitation 511 nm, emission 532-700 nm). The fluorescence intensity at 560 nm was normalized to DFHO alone (right). 2.5 μM of 6mA69 was incubated with 1.25 μM of DFHO in 40 μL of DNA binding buffer at room temperature for 1 hour. Data are presented as mean ± SD with n=2 biological replicates.

(C) Demethylation activity of wtFTO towards 6mA69 measured by fluorescence activation (FA) assay. Fluorescence data are normalized to the non-protein control “buffer”. 2.5 μM of 6mA69 was incubated with wtFTO proteins in 50 μL of reaction mixture at 37 °C for 2 hours. Data are presented as mean ± SD with n=2 biological replicates.

(D) FA assay was performed on 6mA69 upon treatment with cell lysate overexpressing wtFTO. Data are presented as mean ± SD with n=3 biological replicates.


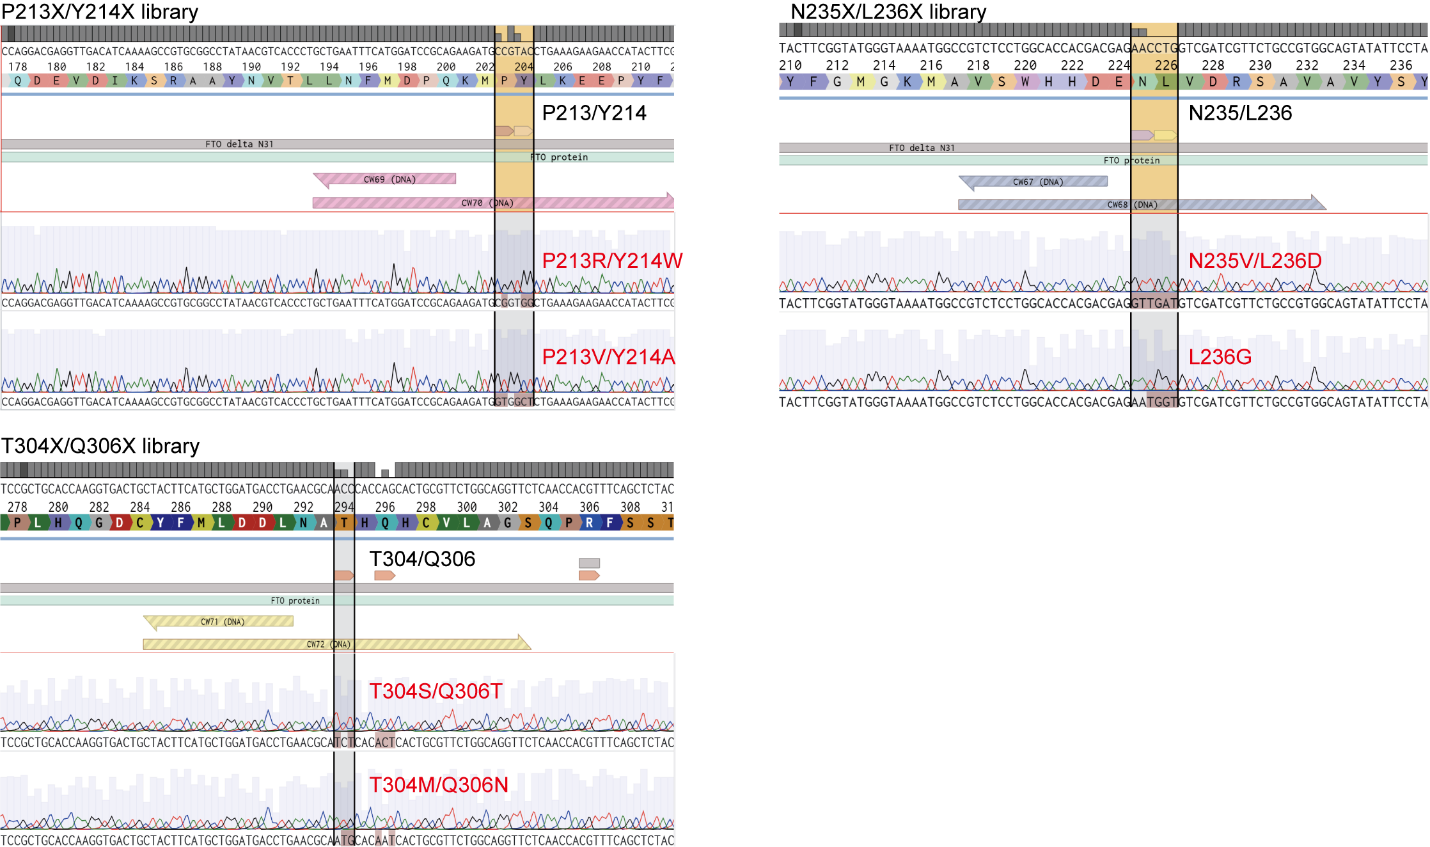


**Supplementary Figure 6. Sanger sequencing validation of genotype diversity at targeted codons in the first round of directed evolution.**

**
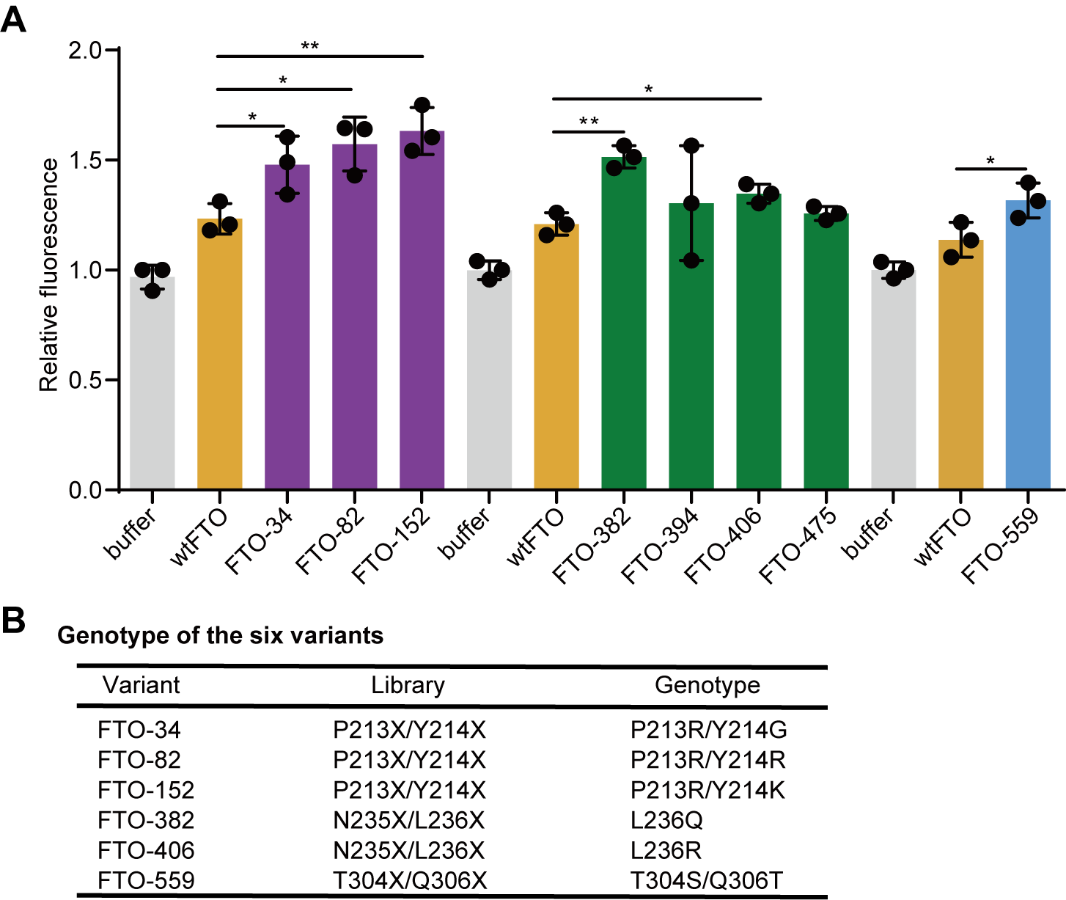
**

**Supplementary Figure 7. Reproducibility test for potential FTO variants from the first round of directed evolution in cell lysates.**

(A) FA assay was performed on 6mA69 upon treatment with cell lysate overexpressing either wtFTO or FTO variants. Data are presented as mean ± SD with n=3 biological replicates. The two-tailed t-test was used to assess the statistical significance of the difference between two samples, with the *p*-value indicated as “*ns*” for *p* ≥ 0.05, “*” for *p* < 0.05, “**” for *p* < 0.01, or “***” for *p* < 0.001. This method was consistently used throughout the study to compare differences between samples.

(B) Genotypes of the six FTO variants identified as positive hits in the reproducibility test shown in (A).

**
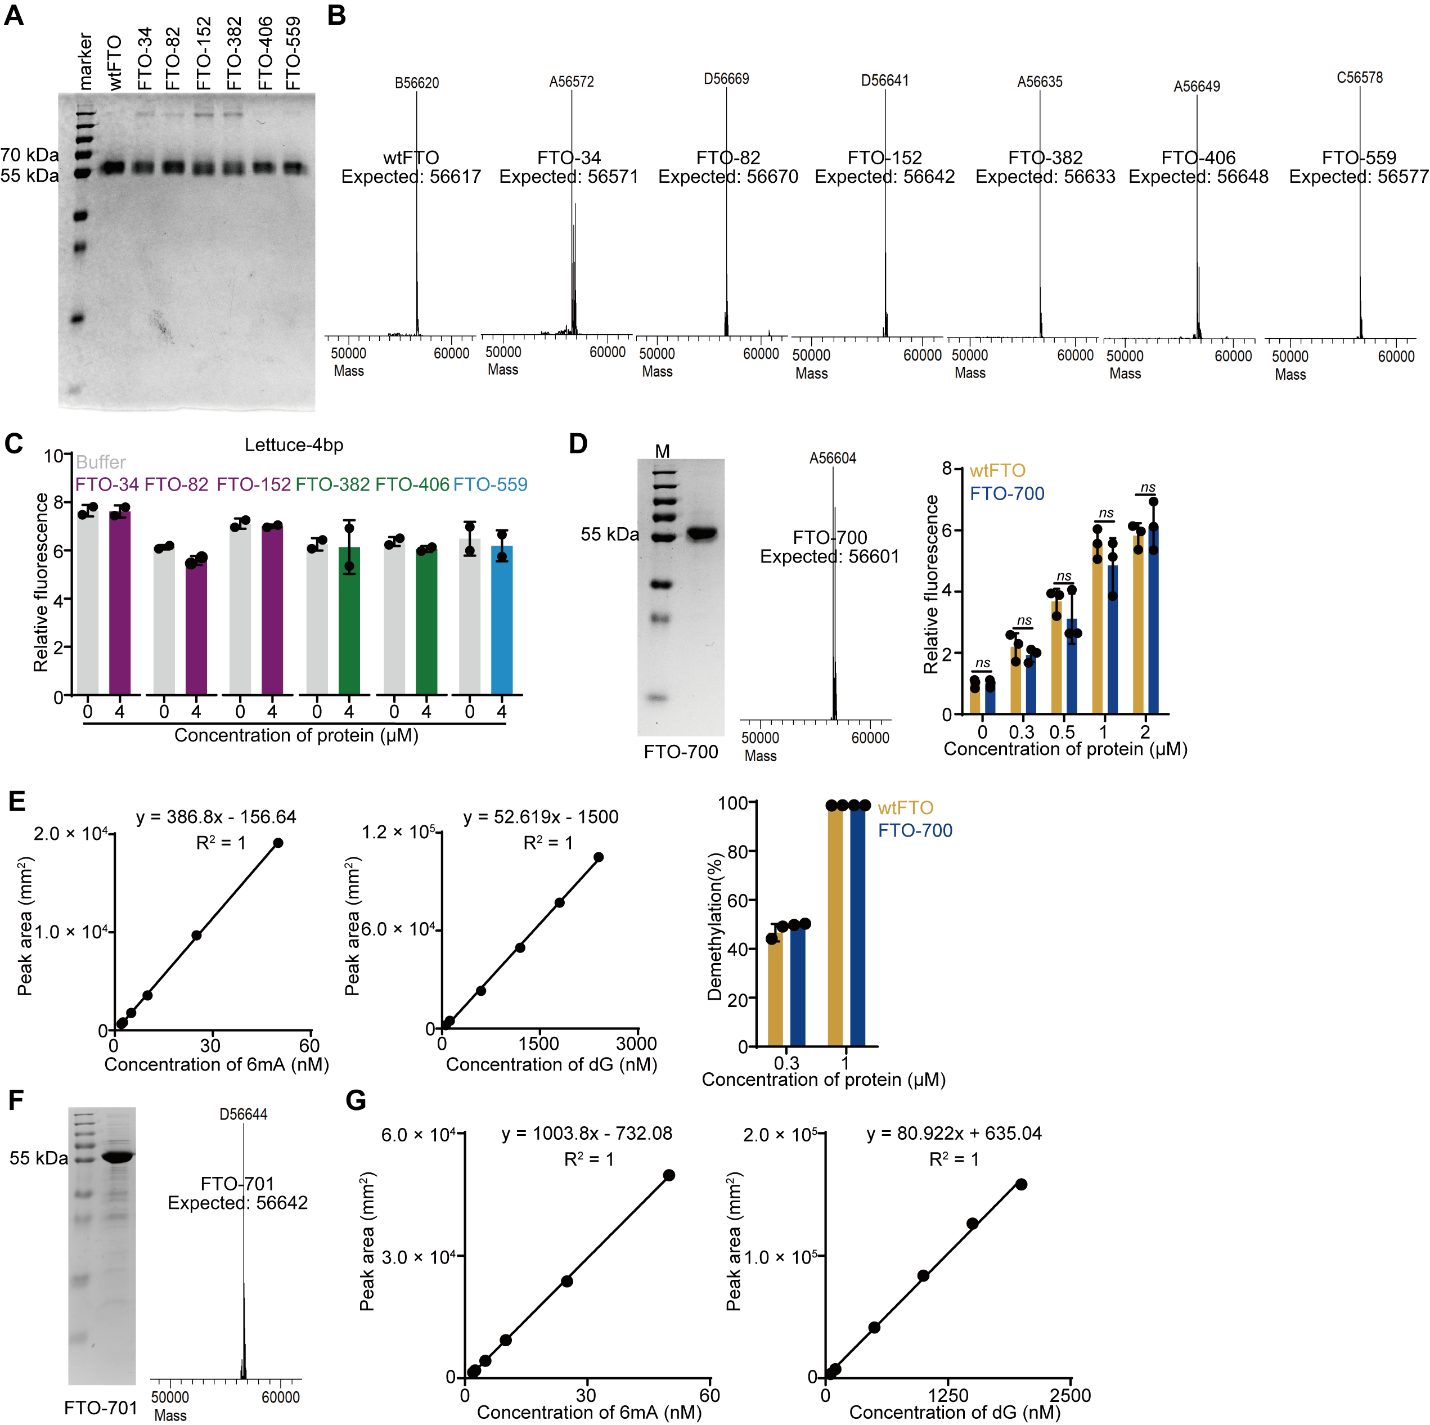
**

**Supplementary Figure 8. Validation of the demethylation activity of FTO variants from the first round of directed evolution using purified proteins.**

(A) SDS-PAGE characterization of the purity of the FTO variants protein after buffer exchange.

(B) Mass spectrometry validation of the molecular weights of purified FTO variants.

(C) Purified FTO variants protein showed no detectable DNase activity. 4 μM wtFTO was incubated with 2.5 μM Lettuce-4bp at 37 °C for 2 hours. Data are presented as mean ± SD with n=2 biological replicates.

(D) SDS-PAGE and MS spectroscopy analysis confirming overexpression and purity of FTO-700 (left and middle). Fluorescence activation of FTO-700 was compared with wtFTO across a series of low protein concentrations measured by FA assay (right). Data are presented as mean ± SD with n=3 biological replicates.

(E) Demethylation activity of wtFTO and FTO-700 toward 6mA69 was quantified by LC-MS/MS. Data are presented as mean ± SD with n=3 biological replicates.

(F) SDS-PAGE and MS spectroscopy analysis confirming overexpression and purity of FTO-701.

(G) Calibration curves and corresponding equations for the quantification of 6mA and dG used in Figure 2G.


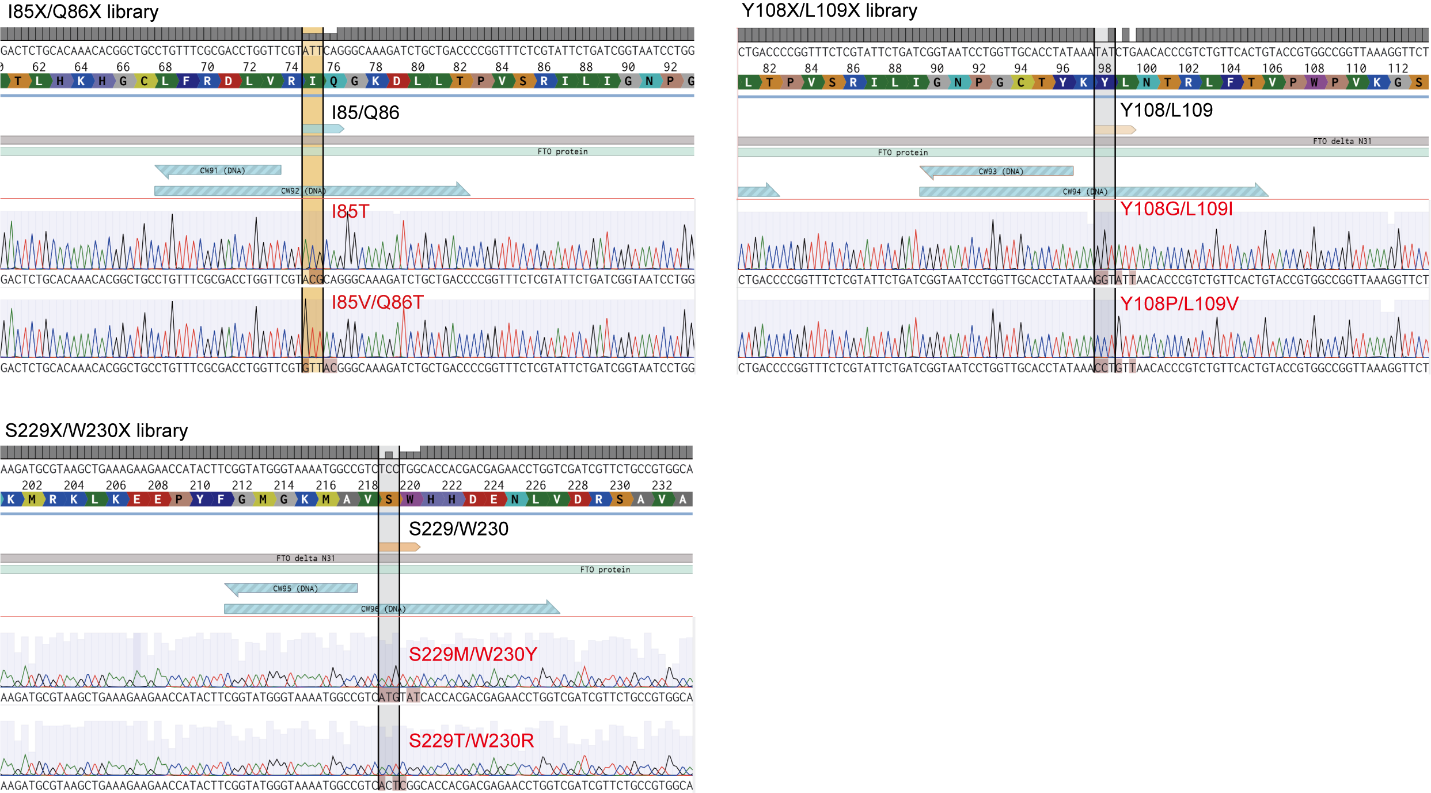


**Supplementary Figure 9. Sanger sequencing validation of genotype diversity at targeted codons in the second round of directed evolution.**

**
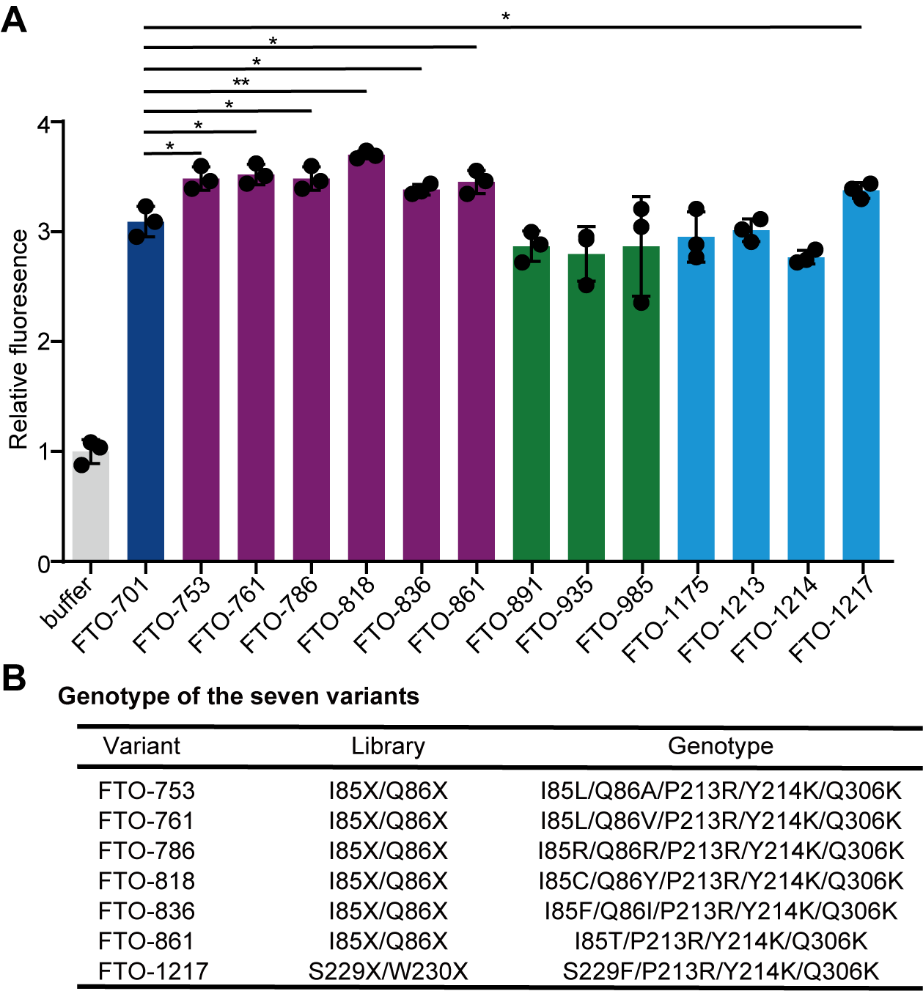
**

**Supplementary Figure 10. Reproducibility test for potential FTO variants from the second round of directed evolution in cell lysates.**

(A) FA assay was performed on 6mA69 upon treatment with cell lysate overexpressing FTO variants. Data are presented as mean ± SD with n=3 biological replicates.

(B) Genotypes of the seven FTO variants identified as positive hits in the reproducibility test shown in (A).


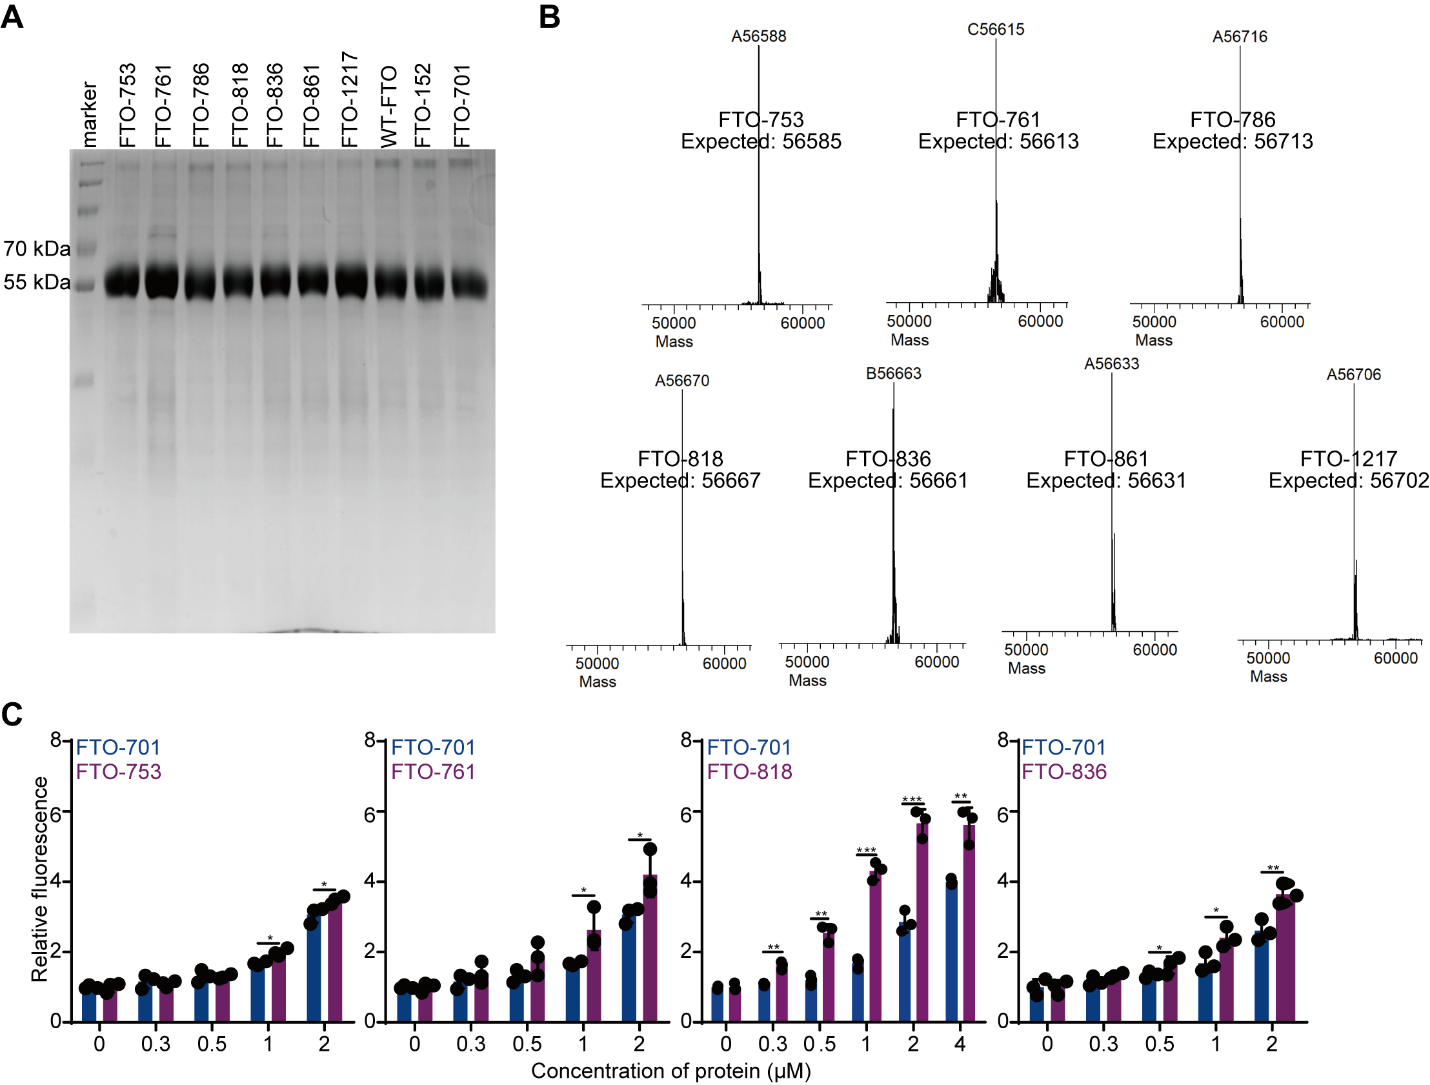


**Supplementary Figure 11. Validation of the demethylation activity of FTO variants from the second round of directed evolution using purified proteins.**

(A) SDS-PAGE characterization of the purity of the FTO variants protein after buffer exchange.

(B) Mass spectrometry validation of the molecular weights of purified FTO variants.

(C) Fluorescence activation of FTO-753, FTO-761, FTO-818, and FTO-836 was compared with FTO-701 across a series of low protein concentrations measured by FA assay (right). Data are presented as mean ± SD with n=3 biological replicates.


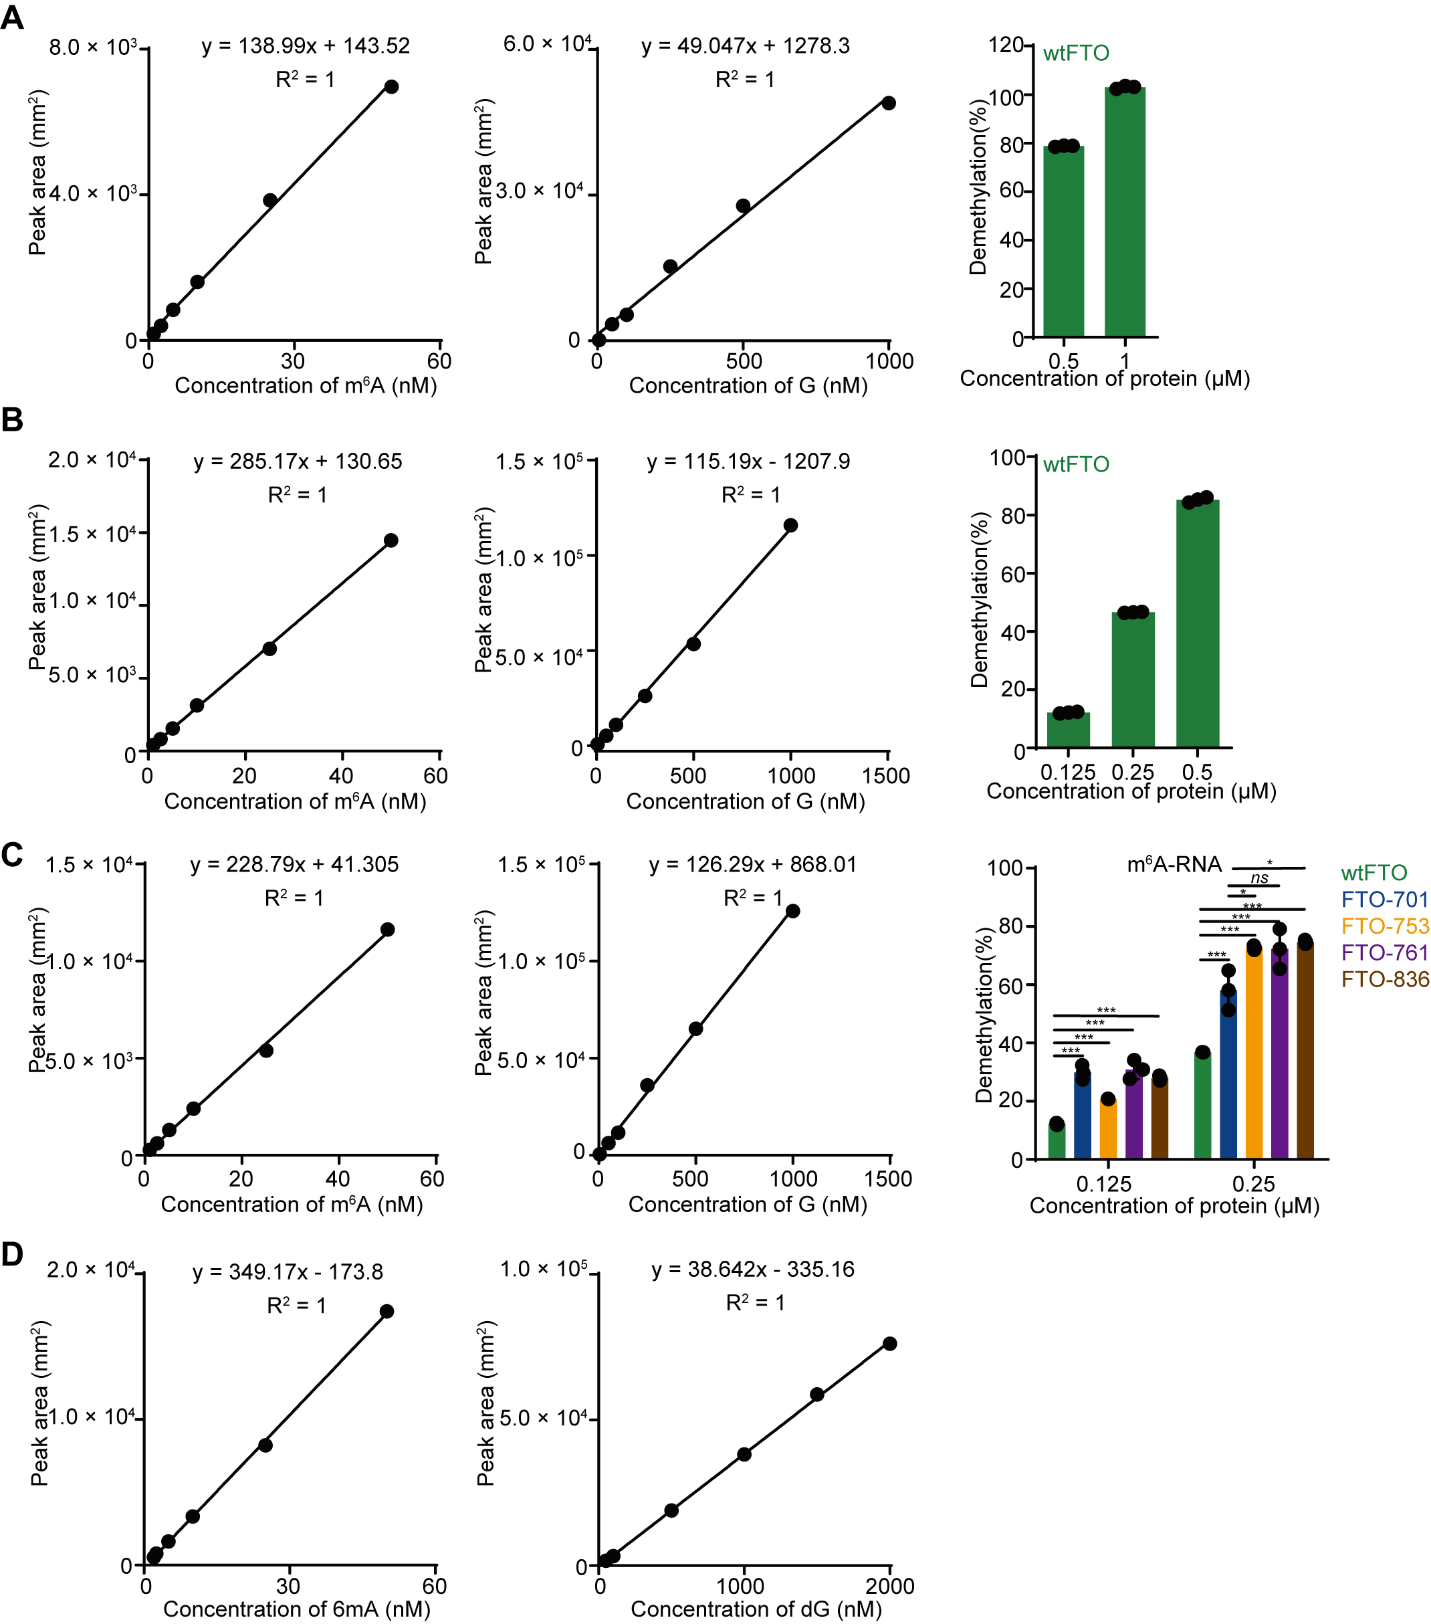


**Supplementary Figure 12. Determination of demethylation activity of wtFTO and FTO variants toward m6A-RNA.**

(A) Benchmarking the demethylation activity of wtFTO. 10 μM m6A-RNA was incubated with 0.5 or 1 μM of wtFTO in 50 μL of reaction mixture. Data are presented as mean ± SD with n=3 biological replicates.

(B) Assessment of wtFTO demethylation activity at different protein concentrations. 1 μM m6A-RNA was incubated with 0.125, 0.25, or 0.5 μM of wtFTO in 50 μL of reaction mixture. Data are presented as mean ± SD with n=3 biological replicates.

(C) Demethylation activity of wtFTO, FTO-701, FTO-753, FTO-761, and FTO-836 toward m6A-RNA quantified by LC-MS/MS. 1 μM m6A-RNA was incubated with 0.125 or 0.25 μM of wtFTO or FTO variant proteins in 50 μL of reaction mixture. Calibration curves and corresponding equations for the quantification of m6A and G, which were also used for Figure 4A (left). Data are presented as mean ± SD with n=3 biological replicates.

(D) Calibration curves and corresponding equations for the quantification of 6mA and dG used in Figure 4A (right).


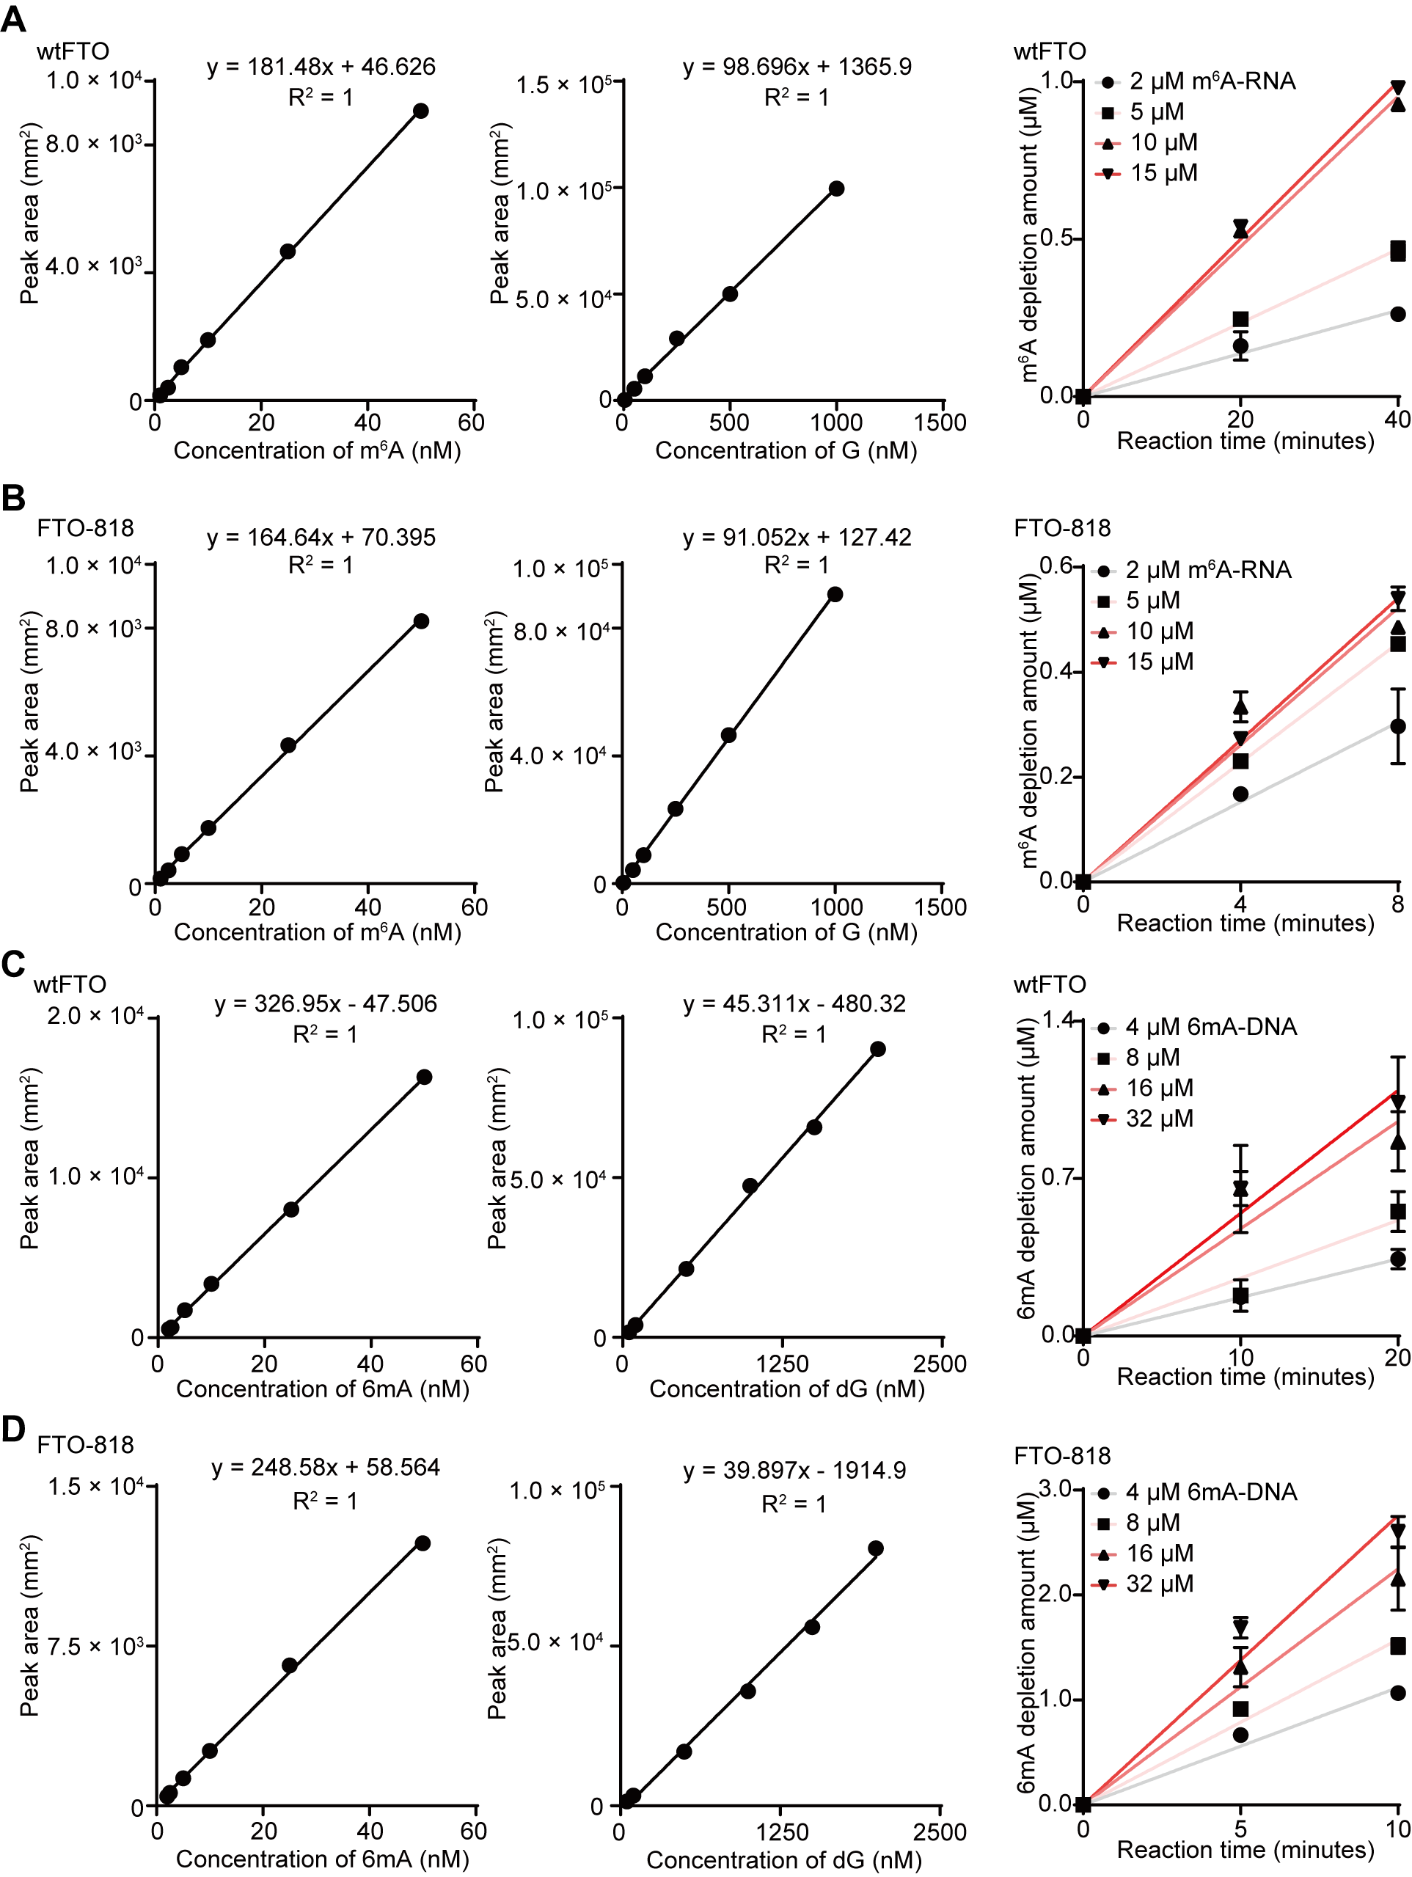


**Supplementary Figure 13. Kinetic analysis for wtFTO and FTO-818 toward m6A-RNA and 6mA-DNA by LC-MS/MS.**

(A-D, left and middle) Calibration curves and corresponding equations for the quantification of m6A and G in RNA, and 6mA and dG in DNA.

(A-D, right) Time-course reaction curves at varying substrate concentrations for wtFTO and FTO-818, used to calculate initial reaction velocities. Data are presented as mean ± SD with n=2 or 3 biological replicates.


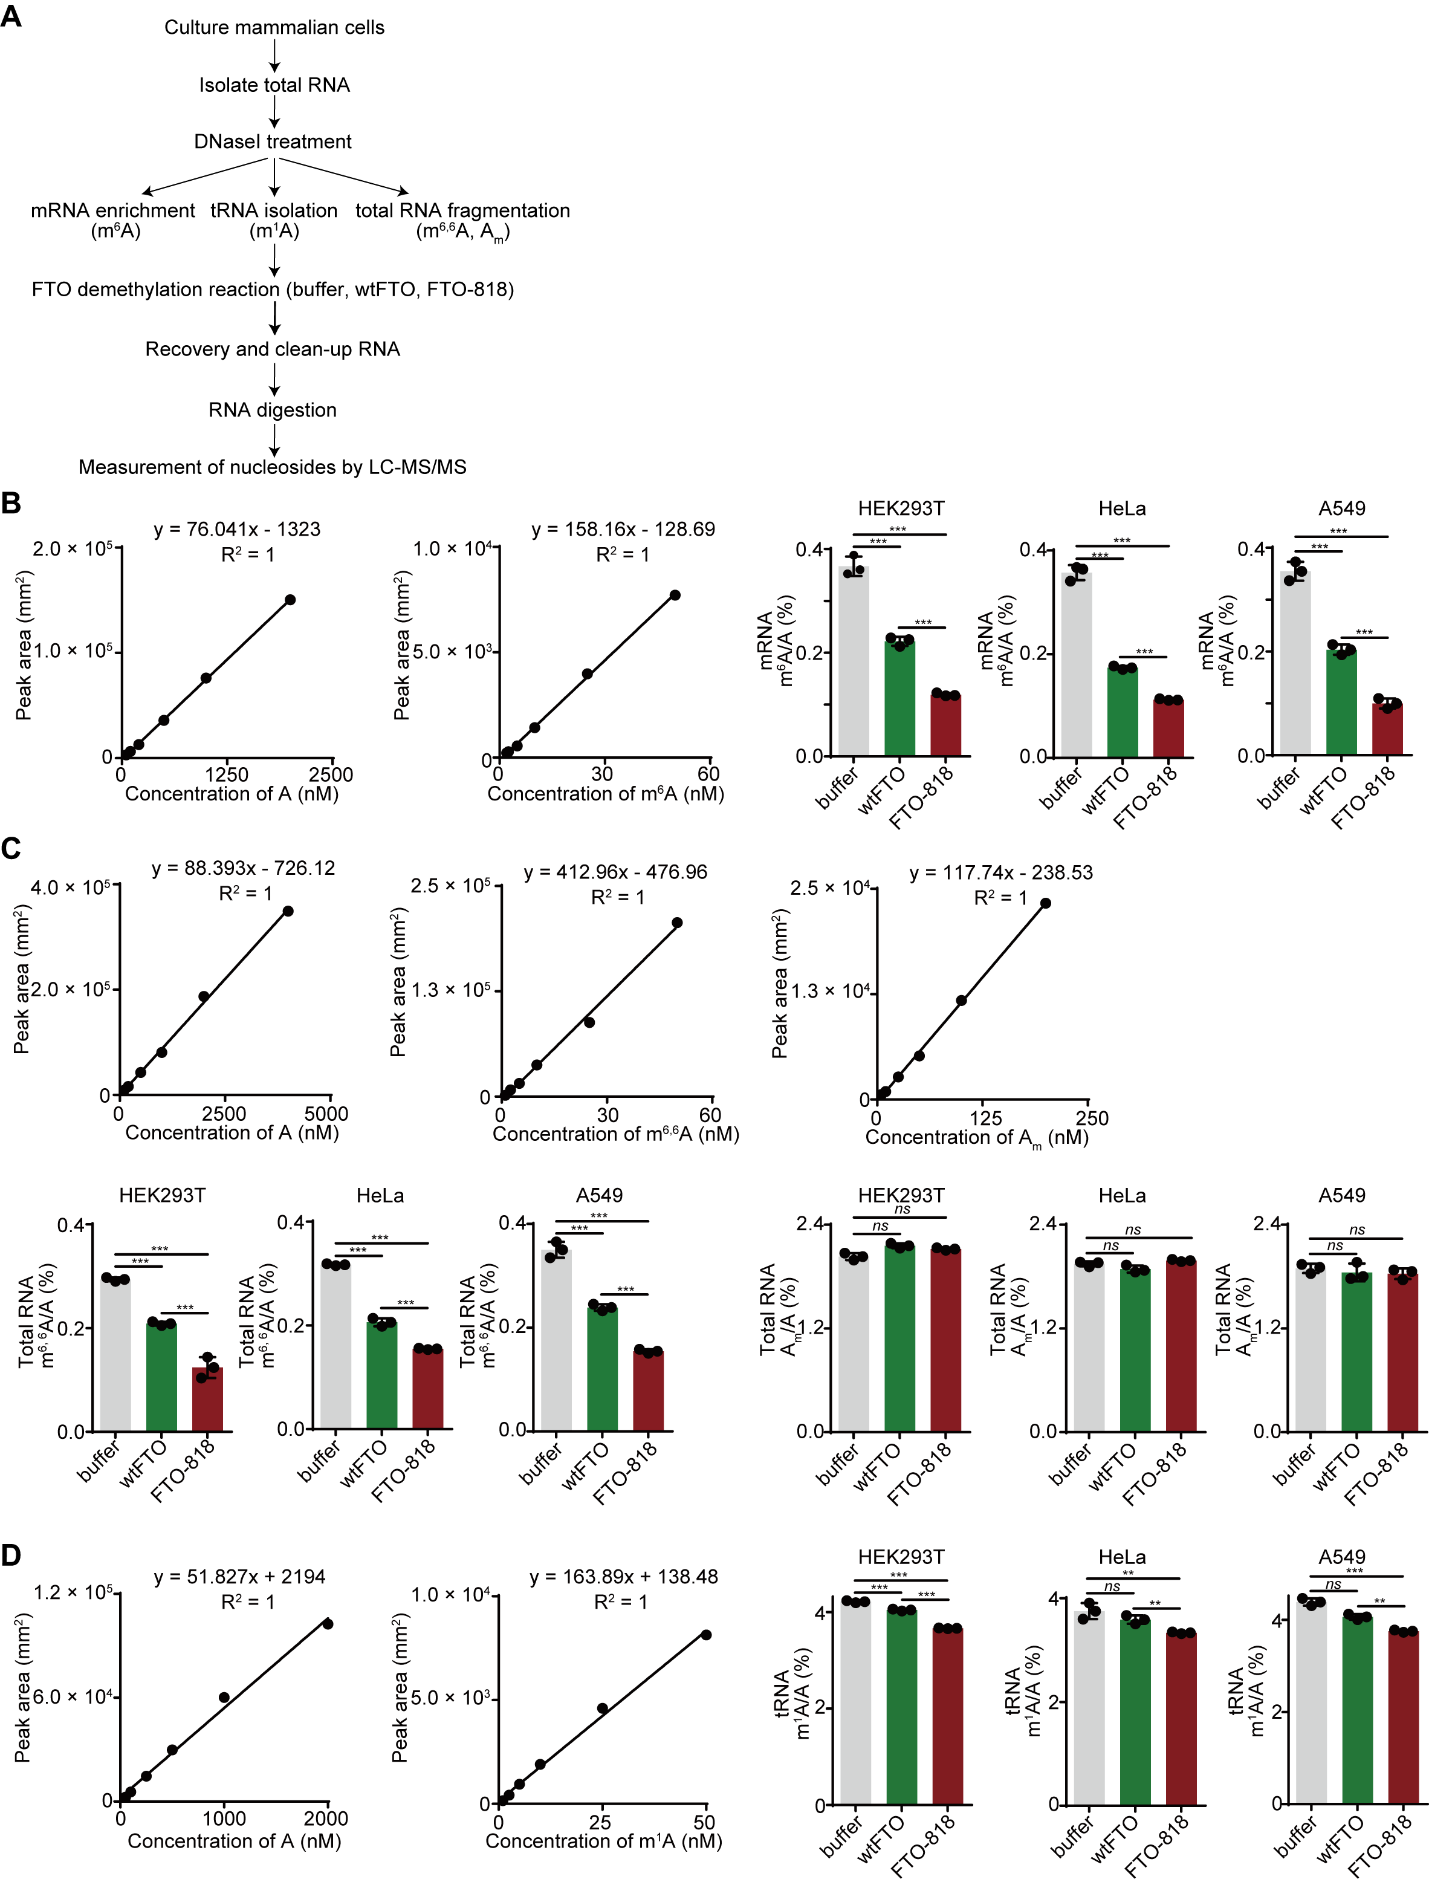


**Supplementary Figure 14. Assessment of the demethylation activity of wtFTO and FTO-818 toward m6A, m6,6A, and m1A in biological RNAs.**

(A) Flow chart of the demethylation reaction using biological RNAs as substrates.

(B) LC-MS/MS quantification of internal m6A/A in mRNA treated with wtFTO or FTO-818 protein *in vitro*. Purified mRNA (400 ng) from mammalian cells was incubated with 0.5 μM of wtFTO or FTO-818 in 50 μL of reaction mixture for 1 hour at 37 °C under demethylation conditions. Data are presented as mean ± SD with n=3 biological replicates.

(C) LC-MS/MS quantification of internal m6,6A/A or Am/A in total RNA treated with wtFTO or FTO-818 protein *in vitro*. Purified total RNA (1,500 ng) from mammalian cells was incubated with 0.5 μM of wtFTO or FTO-818 in 50 μL of reaction mixture for 1 hour at 37 °C under demethylation conditions. Data are presented as mean ± SD with n=3 biological replicates.

(D) LC-MS/MS quantification of internal m1A/A in tRNA treated with wtFTO or FTO-818 protein *in vitro*. Purified tRNA (100 ng) from mammalian cells was incubated with 0.5 μM of wtFTO or FTO-818 in 50 μL of reaction mixture for 1 hour at 37 °C under demethylation conditions. Data are presented as mean ± SD with n=3 biological replicates.


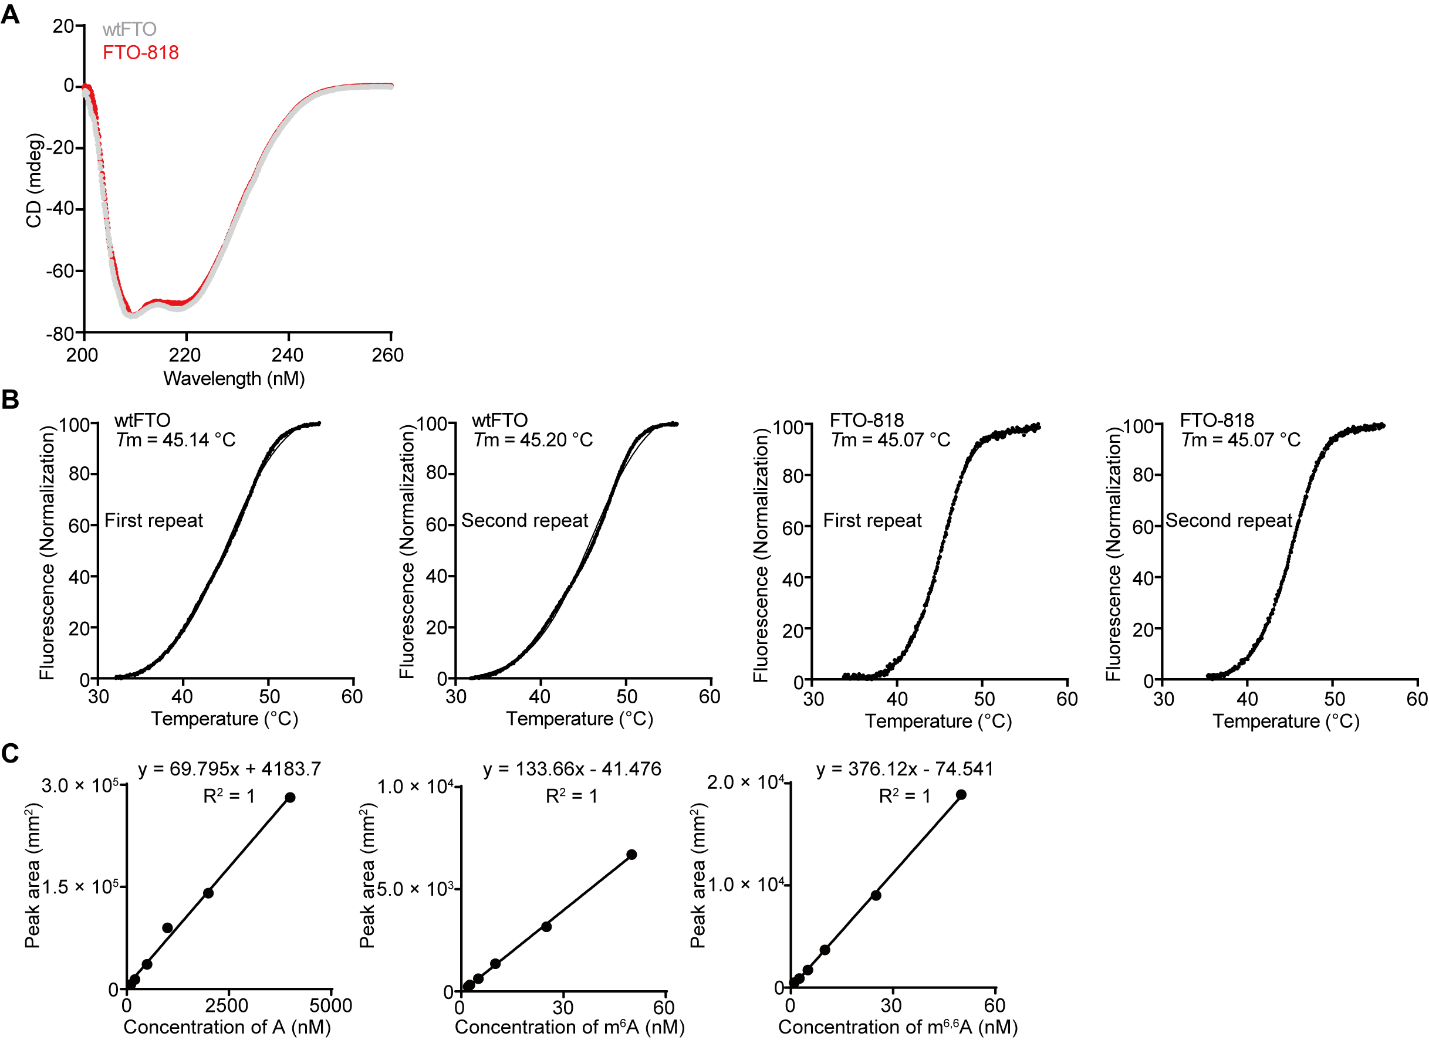


**Supplementary Figure 15. Investigation of the molecular mechanisms underlying the promoted activity of FTO-818 than wtFTO.**

(A) Comparison of the secondary structure of wtFTO and FTO-818 by circular dichroism (CD) spectroscopy.

(B) Comparison of the thermal stability of wtFTO and FTO-818 measured by thermal shift assay.

(C) Calibration curves and corresponding equations for the quantification of m6A, m6,6A, and G used in Figures 5B and 5C.


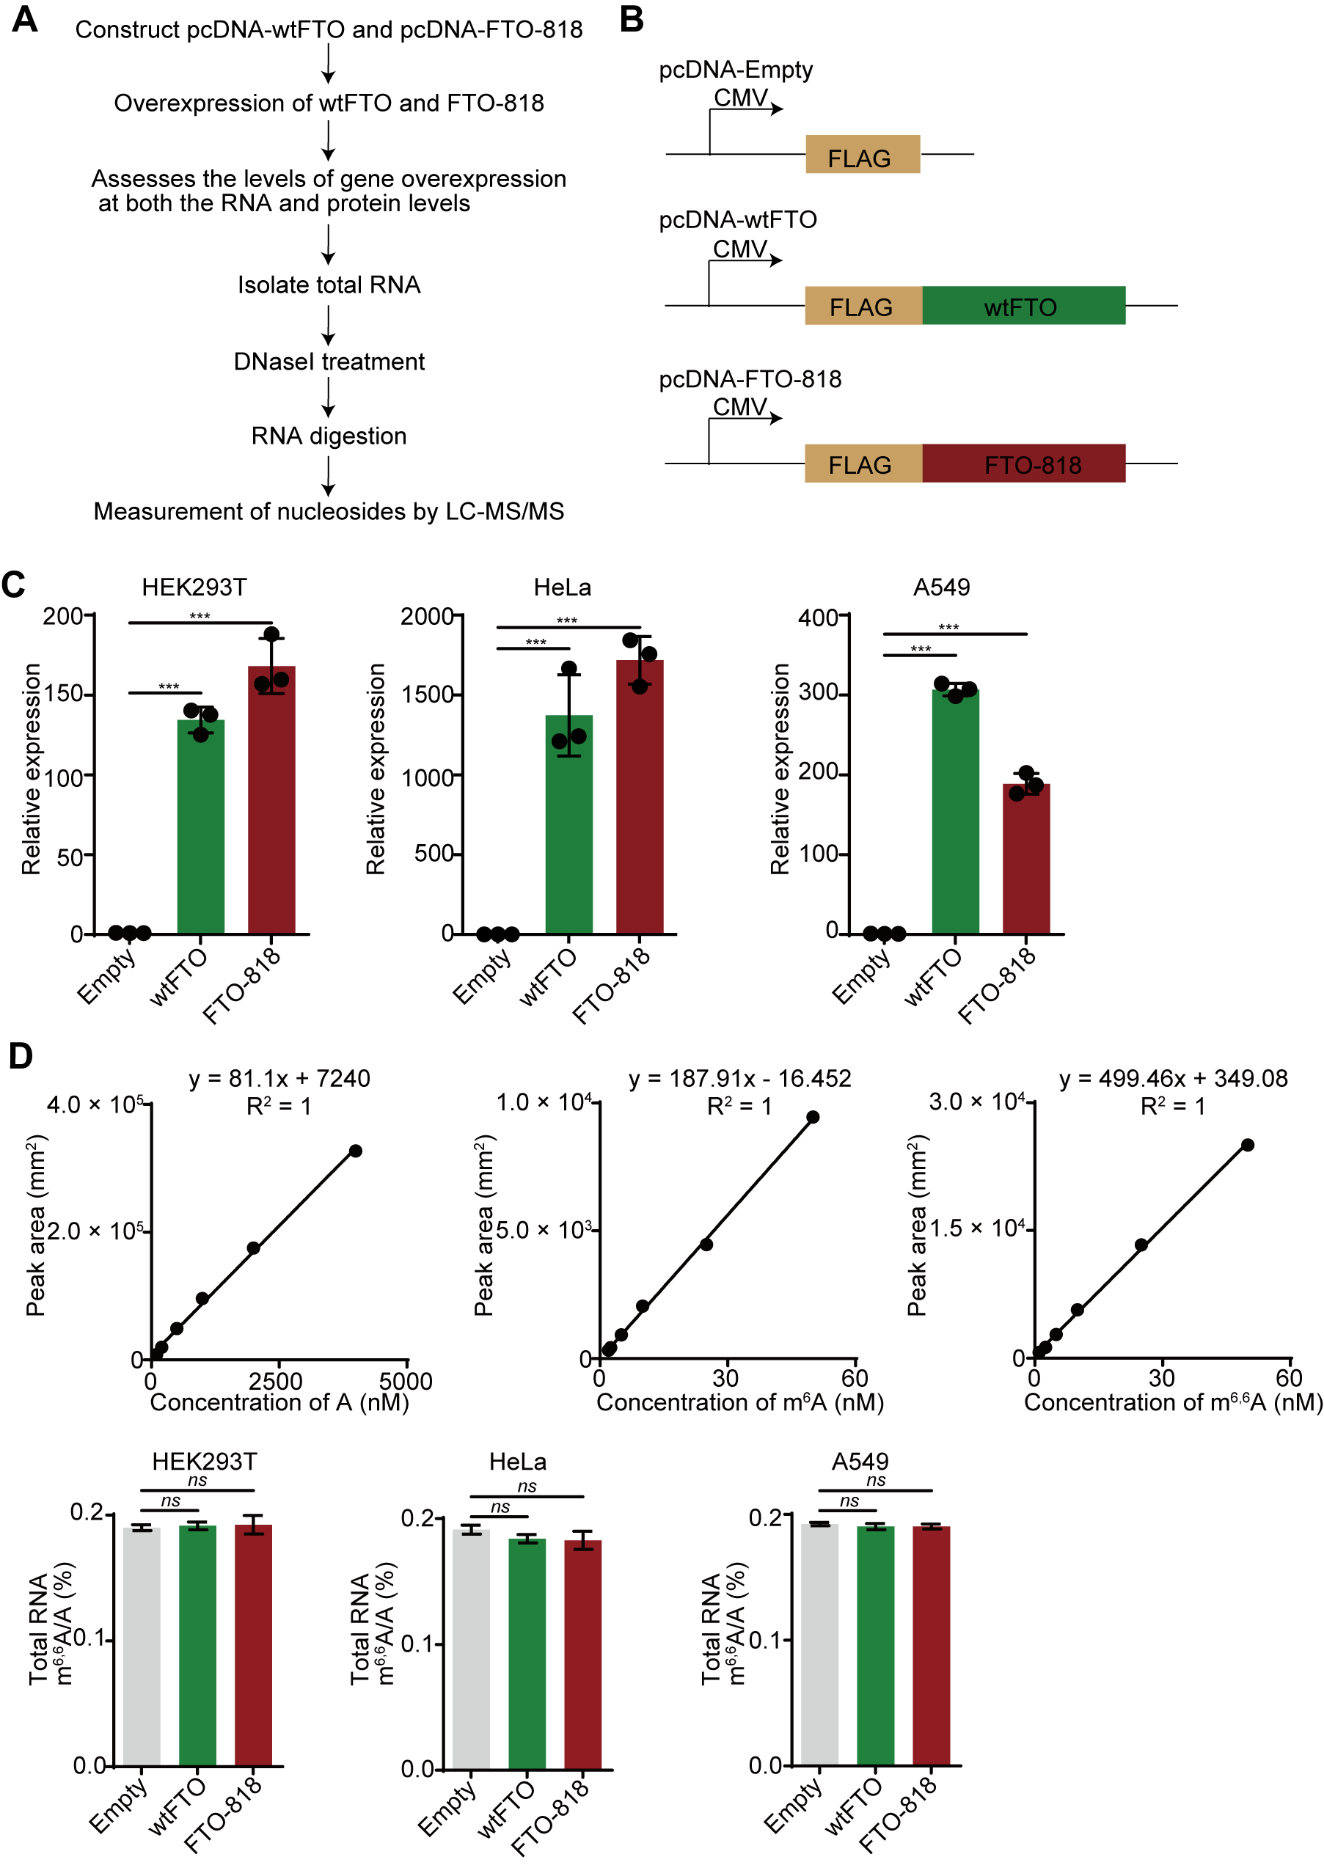


**Supplementary Figure 16. Assessment of the demethylation activity of wtFTO and FTO-818 in living cells.**

(A) Schematic of the workflow for wtFTO and FTO-818 used to evaluate the intracellular m6A/A or m6,6A/A ratio.

(B) Schematic of the sequence information of pcDNA-Empty, pcDNA-wtFTO, and pcDNA-FTO-818.

(C) qPCR analysis of FTO RNA expression after overexpression of wtFTO or FTO-818. Data are presented as mean ± SD with n=3 biological replicates.

(D) Evaluation of the changes in m6,6A/A ratio in mammalian cells after overexpression of wtFTO or FTO-818. Calibration curves and corresponding equations for the quantification of m6A and G, which were also used for Figure 6B. Data are presented as mean ± SD with n=3 biological replicates.


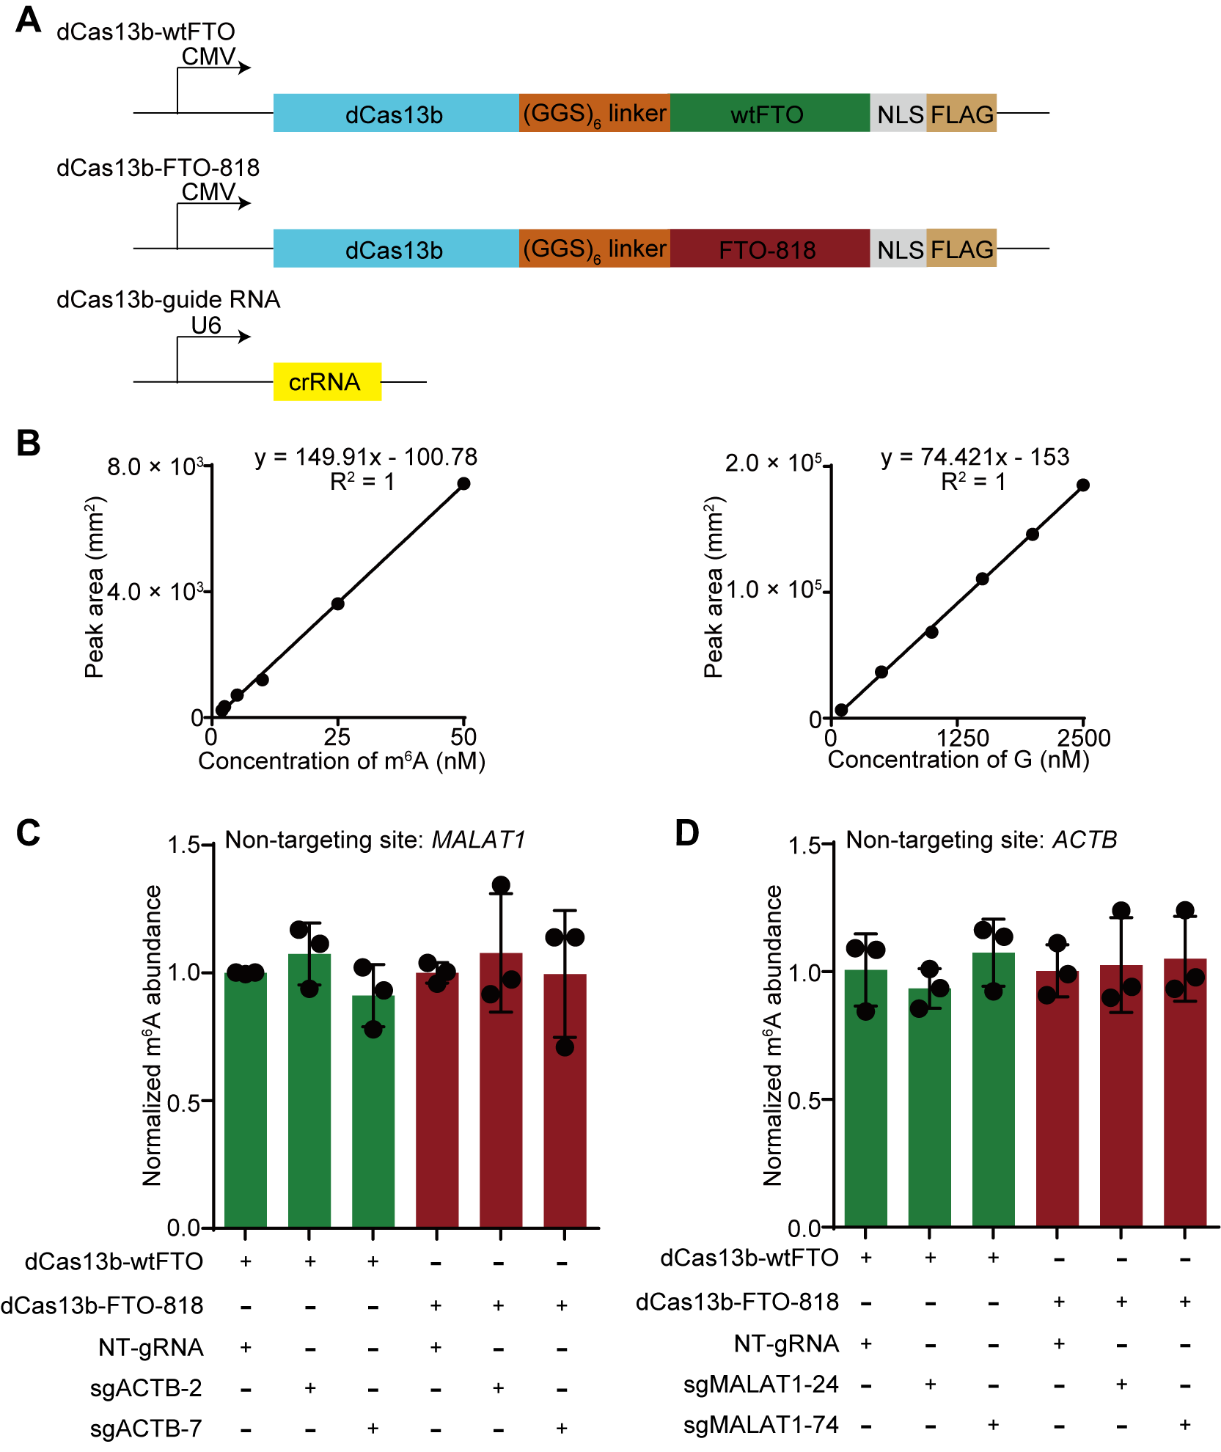


**Supplementary Figure 17. Assessment of the site-specific m6A editing efficiency of dCas13b-FTO-818 and dCas13b-wtFTO.**

(A) Schematic of the sequence information of dCas13b-wtFTO, dCas13b-FTO-818, and dCas13b-guide RNA.

(B) Calibration curves and corresponding equations for the quantification of m6A and G used in Figure 6E.

(C, D) Normalized m6A abundance at non-targeted adenosine sites measured by SELECT. The sgRNA targeting *ACTB* A1216 was analyzed for changes at *MALAT1* A2577 (C), and the sgRNA targeting *MALAT1* A2577 was analyzed for changes at *ACTB* A1216 (D). Data are presented as mean ± SD with n=3 biological replicates.

| Lettuce-4bp | TAGTAGGGATGATGCGGCAGTGGGCTTCGCAGAAC  AGTGTTTATTCGGCGAGGGGACTA |
| --- | --- |
| A69T | TAGTAGGGATGATGCGGCAGTGGGCTTCGCAGAAC  AGTGTTTATTCGGCGTGGGGACTA |
| 6mA69 | TAGTAGGGATGATGCGGCAGTGGGCTTCGCAGAAC  AGTGTTTATTCGGCG(6mA)GGGGACTA |
| FTO qPCR forward | AGAATGTCTGTGACGATGTGG |
| FTO qPCR reverse | GCACTTTCTGTATCGATTGCC |
| β-actin forward | CATCATGAAGTGTGACGTGGA |
| β-actin reverse | AGGGCAGTGATCTCCTTCT |
| MALAT1 forward | CTTTGCAGAGGCATTTCATCC |
| MALAT1 reverse | TGCAAGGTCTCATACACTCAC |
| m6A-RNA | GAACCGG(m6A)CUGUCUUA |
| 6mA-DNA | GAACCGG(6mA)CTGTCTTA |
| Non-targeting guide | cctgagattcctgggttcaaggacttggagcccatggagcagttcatcgc |
| ACTB A1216 guide-2 | cgcctagaagcatttgcggtggacgatgga |
| ACTB A1216 guide-7 | gaagcatttgcggtggacgatggaggggcc |
| MALAT1 A2577 guide-24 | AATTACTCTTGATCTTGAATTACTTCCGTT |
| MALAT1 A2577 guide-74 | TCAAACTAAGCTACTATATTTAAGGCCTTC |
| MALAT1 A2577 target up | tagccagtaccgtagtgcgtgGGATTTAAAAAATAATCTTAACTCAAAG |
| MALAT1 A2577 target down | 5phos/CCAATGCAAAAACATTAAGTcagaggctgagtcgctgcat |
| ACTB A1216 target up | tagccagtaccgtagtgcgtgGTAACGCAACTAAGTCATAG |
| ACTB A1216 target down | 5phos/CCGCCTAGAAGCATTTGCGGcagaggctgagtcgctgcat |
| qPCR-F for SELECT | ATGCAGCGACTCAGCCTCTG |
| qPCR-R for SELECT | TAGCCAGTACCGTAGTGCGTG |

**Supplementary Table 1. List of DNA and RNA oligonucleotides used in this study.**

| Names | Source |
| --- | --- |
| pET28a-FTO (wtFTO) | Jia et al., 2011 |
| pET28a-FTO R316Q | This paper |
| pET28a-FTO P213R/Y214K/Q306K (FTO-701) | This paper |
| pET28a-FTO I85C/Q86Y/P213R/Y214K/Q306K (FTO-818) | This paper |
| pcDNA-Empty | This paper |
| pcDNA-wtFTO | This paper |
| pcDNA-FTO-818 | This paper |
| dPspCas13b-wtFTO | Wei et al., 2022 |
| dPspCas13b-FTO-818 | This paper |
| pC0043-PspCas13b-gRNA non-target | Wei et al., 2022 |
| pC0043-PspCas13b-gRNA ACTB-2 | This paper |
| pC0043-PspCas13b-gRNA ACTB-7 | This paper |
| pC0043-PspCas13b-gRNA MALAT1-24 | This paper |
| pC0043-PspCas13b-gRNA MALAT1-74 | This paper |

**Supplementary Table 2. List of all plasmids used in this study.**
